# Supplementary material
Source: publisher figshare collection journal article supplement (https://diabetesjournals.figshare.com/ndownloader/files/26840714)
Supplement: Supplementary file 1 [file 26840714]

**Supplemental Table S1 – Unadjusted per capita annual dental expenditures in persons with and without diabetes and incremental expenditure associated with diabetes in total, by service type, and by payment source, 2017 USD.**

|                                 | Total population | With Diabetes | Without Diabetes | Incremental expenditure |
|---------------------------------|------------------|---------------|------------------|-------------------------|
| Total                           | 320.08           | 363.91        | 315.08           | 48.83                   |
| Dental service type*            |                  |               |                  |                         |
| Preventive                      | 87.25            | 77.80         | 88.33            | -10.53                  |
| Restorative/Prosthetic/Surgical | 151.23           | 191.33        | 146.66           | 44.67                   |
| Diagnostic/Others               | 81.6             | 94.78         | 80.1             | 14.68                   |
| Payment source                  |                  |               |                  |                         |
| Out-of-pocket                   | 153.61           | 186.97        | 149.81           | 37.16                   |
| Private insurances              | 138.90           | 130.39        | 139.87           | -9.48                   |
| Public/Others†                  | 27.57            | 46.56         | 25.41            | 21.15                   |

\*Dental service type: Preventive - includes cleaning, prophylaxis, polishing, fluoride treatment, and sealant application; Restorative/prosthetic/surgical - includes fillings, inlays, crowns, root canal, implants, bridges, dentures, oral surgery and periodontal surgery. Diagnostic - includes consultation, X-rays, radiographs or bitewings; Others - includes unidentified dental services and multiple services in one dental visit. †Payment source: Public - includes Medicaid, Medicare, veterans administration/CHAMPVA, Tricare, other federal sources (including Indian health service, military treatment facilities, and other care by the federal government), other state and local sources (including community and neighborhood clinics, state and local health departments, and state programs other than Medicaid). Others - workers' compensation, and sources such as automobile, homeowner's and liability insurance, and other miscellaneous or unknown sources.
